# Supplementary material
Source: Springer Nature journal article supplement (https://www.springermedizin.de/resource/supplementary/12936_2011_2039_MOESM4_ESM.pdf/9543418)

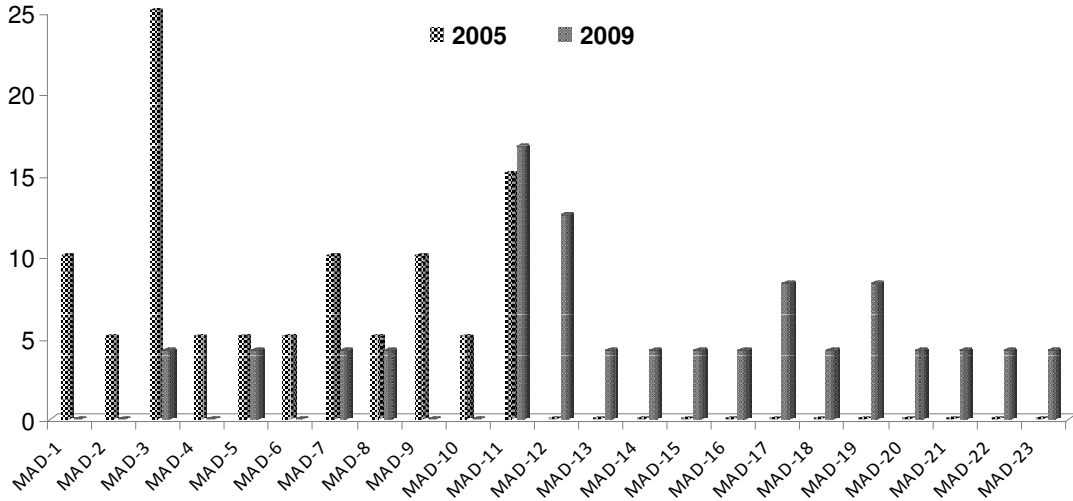

Supplement: MOESM4 [file 9543418]
